# Supplementary material for: Early Diagenetic Processes in the Sediments of the Krka River Estuary
Source: MDPI journal article supplement (doi:10.3390/jmse12030466), 2024-03-08
Supplement: s1 [file s1]

# Early diagenetic processes in the sediments of the Krka River estuary

Nuša Cukrov <sup>1</sup>, Neven Cukrov <sup>1</sup> and Dario Omanović <sup>1,\*</sup>

<sup>1</sup> Division for Marine and Environmental Research, Ruđer Bošković Institute, Bijenička cesta 54, 10000 Zagreb, Croatia; cukrov@irb.hr (Nu.C.); ncukrov@irb.hr (Ne.C.)

\* Correspondence: omanovic@irb.hr (D.O.)

**Table S1.** Information on cores sampled in the Krka River estuary: Core ID, sampling location, water column depth (m), core depth (cm) and sampling date.

| Sediment core ID | Location            | Water depth (m) | Core depth (cm) | Sampling date    |
|------------------|---------------------|-----------------|-----------------|------------------|
| K1               | Head of the estuary | 6.7             | 36              | 19 December 2017 |
| K2               | Prokljan Lake       | 16              | 36              | 24 July 2017     |
| K3               | Guduča River        | 7.3             | 26              | 4 December 2017  |
| K4               | The Fe-Mn factory   | 33              | 22              | 2 February 2017  |
| K5               | Šibenik Port        | 23.7            | 18              | 15 July 2017     |

**Table S2.** Indicators of long-term measurements (n = 68) of elemental concentration ( $\mu\text{gL}^{-1}$ ) in the CASS-5 certified seawater reference material for trace metals (NRCC) using HR ICP-MS with indicated limits of detection (LOD) and quantification (LOQ) in seawater samples. For measurement purposes (HR ICP-MS), the sample is diluted 10× with ultra-pure water (Milli-Q).

| Element | Certified value | AVG   | STD (n=68) | Min   | Max   | LOD   | LOQ   |
|---------|-----------------|-------|------------|-------|-------|-------|-------|
| Mo      | 9.82            | 11.90 | 0.44       | 10.80 | 13.36 | 0.030 | 0.090 |
| Pb      | 0.011           | 0.013 | 0.005      | 0.004 | 0.040 | 0.005 | 0.015 |
| U       | 3.18            | 3.04  | 0.07       | 2.89  | 3.18  | 0.010 | 0.030 |
| Mn      | 2.62            | 2.50  | 0.05       | 2.38  | 2.62  | 0.020 | 0.060 |
| Fe      | 1.44            | 1.79  | 0.21       | 1.43  | 2.30  | 0.100 | 0.300 |
| Co      | 0.095           | 0.091 | 0.008      | 0.067 | 0.112 | 0.003 | 0.010 |
| Cu      | 0.380           | 0.403 | 0.045      | 0.270 | 0.505 | 0.015 | 0.045 |
| Zn      | 0.719           | 0.757 | 0.100      | 0.525 | 0.992 | 0.020 | 0.060 |
| As      | 1.24            | 1.35  | 0.14       | 1.09  | 1.67  | 0.100 | 0.300 |

**Table S3.** The analytical results and recovery rates of the certified reference material PACS-2 (National Research Council of Canada).

|    | Measured value<br>( $\mu\text{g g}^{-1}$ ) | Certified value<br>( $\mu\text{g g}^{-1}$ ) | Recovery<br>(%) |
|----|--------------------------------------------|---------------------------------------------|-----------------|
| Fe | $33973 \pm 351$                            | $40900 \pm 600$                             | 83              |
| Mn | $305 \pm 1.61$                             | $440 \pm 19$                                | 69              |
| Co | $9.05 \pm 0.137$                           | $11.5 \pm 0.3$                              | 79              |
| Cu | $268 \pm 5.69$                             | $310 \pm 12$                                | 86              |
| Zn | $344 \pm 9.07$                             | $364 \pm 23$                                | 94              |
| Pb | $154 \pm 0.509$                            | $183 \pm 8$                                 | 84              |
| Mo | $4.99 \pm 0.087$                           | $5.43 \pm 0.28$                             | 92              |
| As | $25.7 \pm 0.767$                           | $26.2 \pm 1.5$                              | 98              |
| Li | $28 \pm 0.070$                             | $32.2 \pm 2$                                | 88              |
| P  | $957 \pm 20.0$                             | $960 \pm 40$                                | 100             |
| S  | $12031 \pm 391$                            | $12900 \pm 1300$                            | 93              |

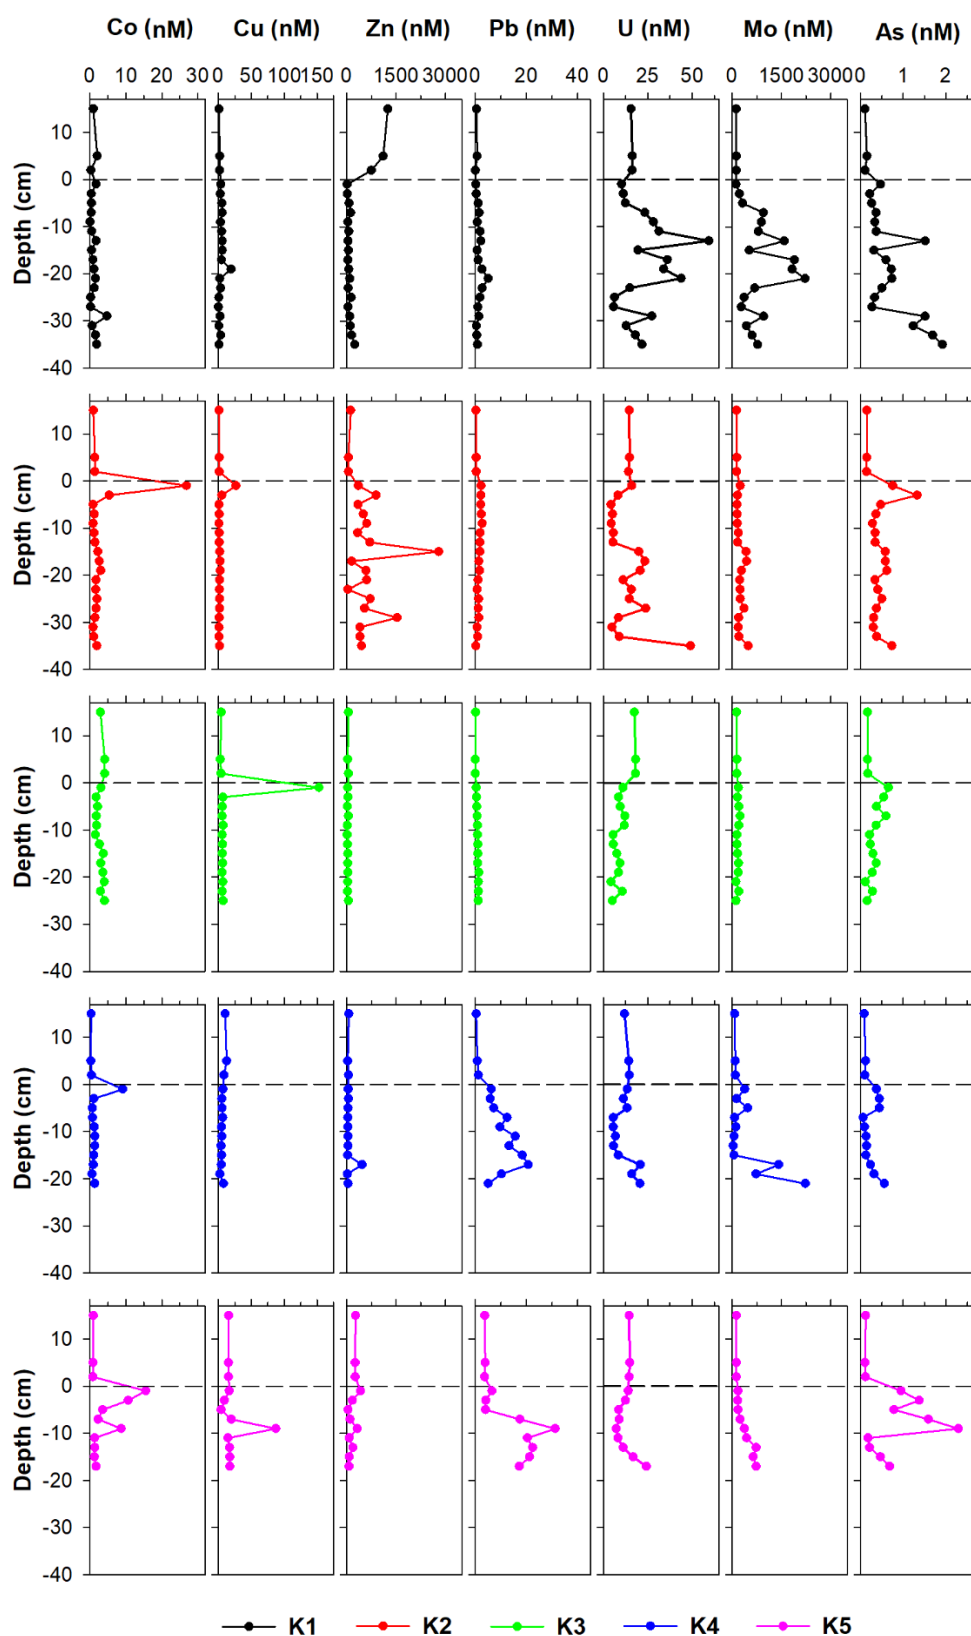

**Figure S1.** The vertical distribution of metals (Co, Cu, Zn, Pb, U, Mo, V, As and Cr) in the overlying water and pore water of sediment cores K1-K5. The dashed line marks the sediment-water interface (SWI).

**Table S4.** Chemical composition of the overlying water and pore water samples from the K1 sampling location (ow – overlying water, pw – pore water, numbers in the sample name indicate distance from the bottom for the overlying water or sediment layer from which pore water was extracted). Values are expressed in  $\mu\text{g L}^{-1}$ .

|             | Mo   | Pb    | U    | Mn   | Fe    | Co    | Cu    | Zn    | As   |
|-------------|------|-------|------|------|-------|-------|-------|-------|------|
| ow 15 cm    | 12.4 | 0.113 | 3.68 | 43.9 | 0.656 | 0.057 | 0.069 | 81.8  | 1.39 |
| ow 5 cm     | 12.8 | 0.164 | 3.88 | 210  | 2.09  | 0.120 | 0.127 | 72.3  | 1.99 |
| ow 2 cm     | 12.5 | 0.024 | 3.86 | 6.61 | 1.39  | 0.016 | 0.115 | 48.9  | 1.41 |
| pw 0-2 cm   | 11.6 | 0.046 | 2.39 | 1385 | 135   | 0.104 | 0.247 | 0.751 | 6.29 |
| pw 2-4 cm   | 21.4 | 0.077 | 2.66 | 119  | 56.3  | 0.023 | 0.194 | 1.14  | 2.88 |
| pw 4-6 cm   | 30.8 | 0.248 | 2.95 | 117  | 49.6  | 0.025 | 0.333 | 4.79  | 3.45 |
| pw 6-8 cm   | 91.3 | 0.324 | 5.55 | 41.4 | 43.7  | 0.023 | 0.368 | 7.82  | 4.87 |
| pw 8-0 cm   | 85.6 | 0.169 | 6.70 | 17.0 | 16.4  | 0.004 | 0.198 | 2.52  | 4.44 |
| pw 10-12 cm | 76.8 | 0.400 | 7.45 | 56.1 | 24.6  | 0.030 | 0.315 | 4.23  | 4.95 |
| pw 12-14 cm | 153  | 0.457 | 14.1 | 56.2 | 33.0  | 0.102 | 0.369 | 2.92  | 20.3 |
| pw 14-16 cm | 50.3 | 0.163 | 4.63 | 30.7 | 15.9  | 0.027 | 0.361 | 3.42  | 4.14 |
| pw 16-18 cm | 182  | 0.254 | 8.57 | 69.7 | 14.2  | 0.050 | 0.294 | 2.55  | 7.96 |
| pw 18-20 cm | 175  | 0.548 | 8.08 | 67.2 | 24.7  | 0.064 | 1.24  | 4.34  | 9.63 |
| pw 20-22 cm | 213  | 1.05  | 10.4 | 83.5 | 16.7  | 0.093 | 0.137 | 6.23  | 9.83 |
| pw 22-24 cm | 65.9 | 0.568 | 3.55 | 112  | 43.5  | 0.073 | 0.224 | 3.11  | 6.66 |
| pw 24-26 cm | 35.6 | 0.391 | 1.46 | 127  | 27.1  | 0.015 | 0.044 | 9.21  | 4.42 |
| pw 26-28 cm | 26.8 | 0.221 | 1.32 | 147  | 6.58  | 0.013 | 0.008 | 2.83  | 3.61 |
| pw 28-30 cm | 92.3 | 0.291 | 6.51 | 125  | 3.54  | 0.280 | 0.175 | 6.10  | 20.2 |
| pw 30-32 cm | 42.3 | 0.097 | 3.03 | 199  | 3.17  | 0.039 | 0.044 | 7.27  | 16.5 |
| pw 32-34 cm | 58.5 | 0.128 | 4.26 | 179  | 5.49  | 0.092 | 0.228 | 9.82  | 22.6 |
| pw 34-36 cm | 74.7 | 0.193 | 5.16 | 206  | 5.84  | 0.110 | 0.067 | 16.1  | 25.6 |

**Table S5.** Chemical composition of the overlying water and pore water samples from the K2 sampling location (ow – overlying water, pw – pore water, numbers in the sample name indicate distance from the bottom for the overlying water or sediment layer from which pore water was extracted). Values are expressed in  $\mu\text{g L}^{-1}$ .

|             | Mo   | Pb    | U    | Mn   | Fe   | Co   | Cu   | Zn   | As   |
|-------------|------|-------|------|------|------|------|------|------|------|
| ow 15 cm    | 13.2 | 0.072 | 3.47 | 15.8 | 1.09 | 0.06 | 0.76 | 7.80 | 1.96 |
| ow 5 cm     | 13.8 | 0.079 | 3.49 | 16.1 | 1.19 | 0.08 | 0.61 | 3.55 | 1.95 |
| ow 2 cm     | 13.3 | 0.079 | 3.35 | 18.3 | 2.62 | 0.08 | 0.56 | 3.35 | 1.87 |
| pw 0-2 cm   | 24.2 | 0.468 | 3.80 | 4268 | 944  | 1.58 | 0.21 | 23.2 | 10.1 |
| pw 2-4 cm   | 16.3 | 0.455 | 1.91 | 1508 | 2775 | 0.32 | 0.16 | 58.2 | 17.7 |
| pw 4-6 cm   | 14.3 | 0.450 | 0.98 | 1184 | 987  | 0.05 | 0.08 | 22.5 | 6.36 |
| pw 6-8 cm   | 15.2 | 0.497 | 1.19 | 1115 | 462  | 0.07 | 0.20 | 33.3 | 4.83 |
| pw 8-0 cm   | 15.2 | 0.569 | 1.02 | 1189 | 207  | 0.05 | 0.17 | 39.6 | 3.73 |
| pw 10-12 cm | 18.6 | 0.395 | 1.30 | 1200 | 108  | 0.07 | 0.08 | 21.5 | 4.58 |
| pw 12-14 cm | 16.8 | 0.390 | 1.23 | 1164 | 74.3 | 0.08 | 0.12 | 46.2 | 4.60 |
| pw 14-16 cm | 41.0 | 0.387 | 4.75 | 902  | 26.9 | 0.13 | 0.24 | 183  | 7.80 |
| pw 16-18 cm | 42.6 | 0.289 | 5.57 | 950  | 14.2 | 0.15 | 0.08 | 9.92 | 7.78 |
| pw 18-20 cm | 27.6 | 0.362 | 4.92 | 503  | 7.10 | 0.18 | 0.08 | 38.4 | 8.25 |
| pw 20-22 cm | 22.7 | 0.228 | 2.64 | 850  | 31.4 | 0.10 | 0.06 | 39.5 | 4.50 |
| pw 22-24 cm | 23.6 | 0.162 | 3.75 | 869  | 65.4 | 0.10 | 0.03 | 2.53 | 5.41 |
| pw 24-26 cm | 24.2 | 0.286 | 3.48 | 882  | 65.8 | 0.12 | 0.06 | 46.8 | 6.70 |
| pw 26-28 cm | 35.2 | 0.242 | 5.68 | 830  | 44.1 | 0.10 | 0.09 | 35.5 | 4.98 |
| pw 28-30 cm | 19.1 | 0.291 | 1.98 | 924  | 55.0 | 0.08 | 0.04 | 100  | 4.12 |
| pw 30-32 cm | 18.1 | 0.160 | 1.10 | 969  | 105  | 0.05 | 0.02 | 26.6 | 4.00 |
| pw 32-34 cm | 20.1 | 0.197 | 2.08 | 822  | 100  | 0.06 | 0.06 | 26.4 | 5.02 |
| pw 34-36 cm | 46.9 | 0.055 | 11.7 | 524  | 49.6 | 0.11 | 0.10 | 29.5 | 9.81 |

**Table S6.** Chemical composition of the overlying water and pore water samples from the K3 sampling location (ow – overlying water, pw – pore water, numbers in the sample name indicate distance from the bottom for the overlying water or sediment layer from which pore water was extracted). Values are expressed in  $\mu\text{g L}^{-1}$ .

|             | Mo    | Pb    | U     | Mn  | Fe    | Co    | Cu    | Zn   | As   |
|-------------|-------|-------|-------|-----|-------|-------|-------|------|------|
| ow 15 cm    | 13.53 | 0.033 | 4.14  | 199 | 0.494 | 0.174 | 0.279 | 3.35 | 2.19 |
| ow 5 cm     | 14.19 | 0.009 | 4.32  | 269 | 1.10  | 0.244 | 0.190 | 2.19 | 2.18 |
| ow 2 cm     | 13.81 | 0.005 | 4.30  | 272 | 2.96  | 0.242 | 0.253 | 3.47 | 2.28 |
| pw 0-2 cm   | 18.60 | 0.078 | 2.61  | 984 | 791   | 0.182 | 9.701 | 1.88 | 8.72 |
| pw 2-4 cm   | 15.84 | 0.109 | 1.98  | 600 | 353   | 0.101 | 0.439 | 2.65 | 7.25 |
| pw 4-6 cm   | 19.75 | 0.135 | 2.23  | 531 | 212   | 0.127 | 0.383 | 1.29 | 4.97 |
| pw 6-8 cm   | 23.77 | 0.160 | 2.87  | 424 | 134   | 0.105 | 0.365 | 3.49 | 7.95 |
| pw 8-0 cm   | 19.57 | 0.182 | 2.78  | 371 | 124   | 0.110 | 0.457 | 1.20 | 4.85 |
| pw 10-12 cm | 14.61 | 0.193 | 1.25  | 410 | 196   | 0.091 | 0.376 | 1.08 | 2.82 |
| pw 12-14 cm | 14.52 | 0.222 | 1.28  | 417 | 282   | 0.157 | 0.397 | 1.70 | 3.07 |
| pw 14-16 cm | 16.17 | 0.223 | 1.77  | 423 | 238   | 0.220 | 0.385 | 2.43 | 3.88 |
| pw 16-18 cm | 19.09 | 0.209 | 2.20  | 425 | 281   | 0.178 | 0.414 | 2.04 | 4.92 |
| pw 18-20 cm | 18.00 | 0.299 | 1.98  | 442 | 381   | 0.213 | 0.366 | 2.42 | 3.70 |
| pw 20-22 cm | 11.50 | 0.264 | 0.974 | 447 | 498   | 0.237 | 0.448 | 2.05 | 1.46 |
| pw 22-24 cm | 19.91 | 0.259 | 2.52  | 443 | 469   | 0.174 | 0.365 | 1.69 | 3.75 |
| pw 24-26 cm | 11.92 | 0.249 | 1.17  | 423 | 563   | 0.238 | 0.450 | 3.67 | 2.08 |

**Table S7.** Chemical composition of the overlying water and pore water samples from the K4 sampling location (ow – overlying water, pw – pore water, numbers in the sample name indicate distance from the bottom for the overlying water or sediment layer from which pore water was extracted). Values are expressed in  $\mu\text{g L}^{-1}$ .

|             | Mo   | Pb    | U    | Mn   | Fe    | Co    | Cu    | Zn   | As    |
|-------------|------|-------|------|------|-------|-------|-------|------|-------|
| ow 15 cm    | 9.60 | 0.086 | 2.83 | 3.18 | 0.529 | 0.019 | 0.655 | 4.31 | 1.13  |
| ow 5 cm     | 11.7 | 0.176 | 3.40 | 5.11 | 0.433 | 0.017 | 0.797 | 1.96 | 1.62  |
| ow 2 cm     | 12.6 | 0.266 | 3.48 | 6.89 | 0.422 | 0.025 | 0.531 | 3.52 | 1.30  |
| pw 0-2 cm   | 39.4 | 1.30  | 3.20 | 5501 | 431   | 0.539 | 0.439 | 3.11 | 4.97  |
| pw 2-4 cm   | 15.6 | 1.22  | 2.66 | 1593 | 603   | 0.066 | 0.334 | 3.57 | 5.91  |
| pw 4-6 cm   | 47.4 | 1.49  | 3.17 | 1578 | 329   | 0.040 | 0.343 | 2.76 | 5.89  |
| pw 6-8 cm   | 9.84 | 2.59  | 1.30 | 2173 | 65.2  | 0.045 | 0.417 | 2.34 | 0.870 |
| pw 8-0 cm   | 14.2 | 2.00  | 1.29 | 2684 | 166   | 0.072 | 0.298 | 2.24 | 1.23  |
| pw 10-12 cm | 8.77 | 3.25  | 1.56 | 2921 | 50.4  | 0.085 | 0.328 | 2.94 | 1.71  |
| pw 12-14 cm | 6.27 | 2.74  | 1.30 | 3113 | 47.3  | 0.081 | 0.252 | 2.85 | 1.89  |
| pw 14-16 cm | 8.35 | 3.81  | 1.95 | 2701 | 29.8  | 0.061 | 0.322 | 2.15 | 1.68  |
| pw 16-18 cm | 141  | 4.29  | 4.94 | 1633 | 75.8  | 0.058 | 0.270 | 30.7 | 3.15  |
| pw 18-20 cm | 73.2 | 2.12  | 3.79 | 1361 | 76.4  | 0.036 | 0.146 | 1.39 | 4.22  |
| pw 20-22 cm | 221  | 1.05  | 4.89 | 944  | 114   | 0.082 | 0.503 | 2.64 | 7.41  |

**Table S8.** Chemical composition of the overlying water and pore water samples from the K5 sampling location (ow – overlying water, pw – pore water, numbers in the sample name indicate distance from the bottom for the overlying water or sediment layer from which pore water was extracted). Values are expressed in  $\mu\text{g L}^{-1}$ .

|                    | Mo   | Pb    | U    | Mn   | Fe    | Co    | Cu    | Zn   | As   |
|--------------------|------|-------|------|------|-------|-------|-------|------|------|
| <b>ow 15 cm</b>    | 12.7 | 0.784 | 3.43 | 23.1 | 0.634 | 0.057 | 0.993 | 17.6 | 1.63 |
| <b>ow 5 cm</b>     | 13.0 | 0.811 | 3.52 | 23.0 | 0.580 | 0.055 | 0.977 | 17.0 | 1.46 |
| <b>ow 2 cm</b>     | 12.7 | 0.755 | 3.45 | 32.2 | 0.831 | 0.051 | 0.977 | 16.8 | 1.57 |
| <b>pw 0-2 cm</b>   | 17.5 | 1.35  | 3.32 | 3836 | 186   | 0.915 | 1.06  | 27.7 | 12.7 |
| <b>pw 2-4 cm</b>   | 16.7 | 0.856 | 2.95 | 3235 | 1202  | 0.628 | 0.586 | 11.5 | 18.4 |
| <b>pw 4-6 cm</b>   | 17.6 | 0.833 | 2.02 | 2582 | 369   | 0.210 | 0.260 | 2.92 | 10.5 |
| <b>pw 6-8 cm</b>   | 23.7 | 3.62  | 2.09 | 2039 | 48.4  | 0.136 | 1.26  | 6.96 | 21.2 |
| <b>pw 8-0 cm</b>   | 36.0 | 6.48  | 1.70 | 1490 | 238   | 0.513 | 5.56  | 21.1 | 30.6 |
| <b>pw 10-12 cm</b> | 42.7 | 4.22  | 1.93 | 1238 | 20.1  | 0.078 | 0.935 | 4.90 | 2.39 |
| <b>pw 12-14 cm</b> | 70.4 | 4.65  | 2.64 | 1136 | 60.3  | 0.081 | 1.08  | 12.4 | 2.84 |
| <b>pw 14-16 cm</b> | 61.6 | 4.40  | 3.97 | 1077 | 63.0  | 0.075 | 1.11  | 5.03 | 6.22 |
| <b>pw 16-18 cm</b> | 70.5 | 3.56  | 5.74 | 1005 | 17.0  | 0.102 | 1.10  | 4.50 | 9.10 |

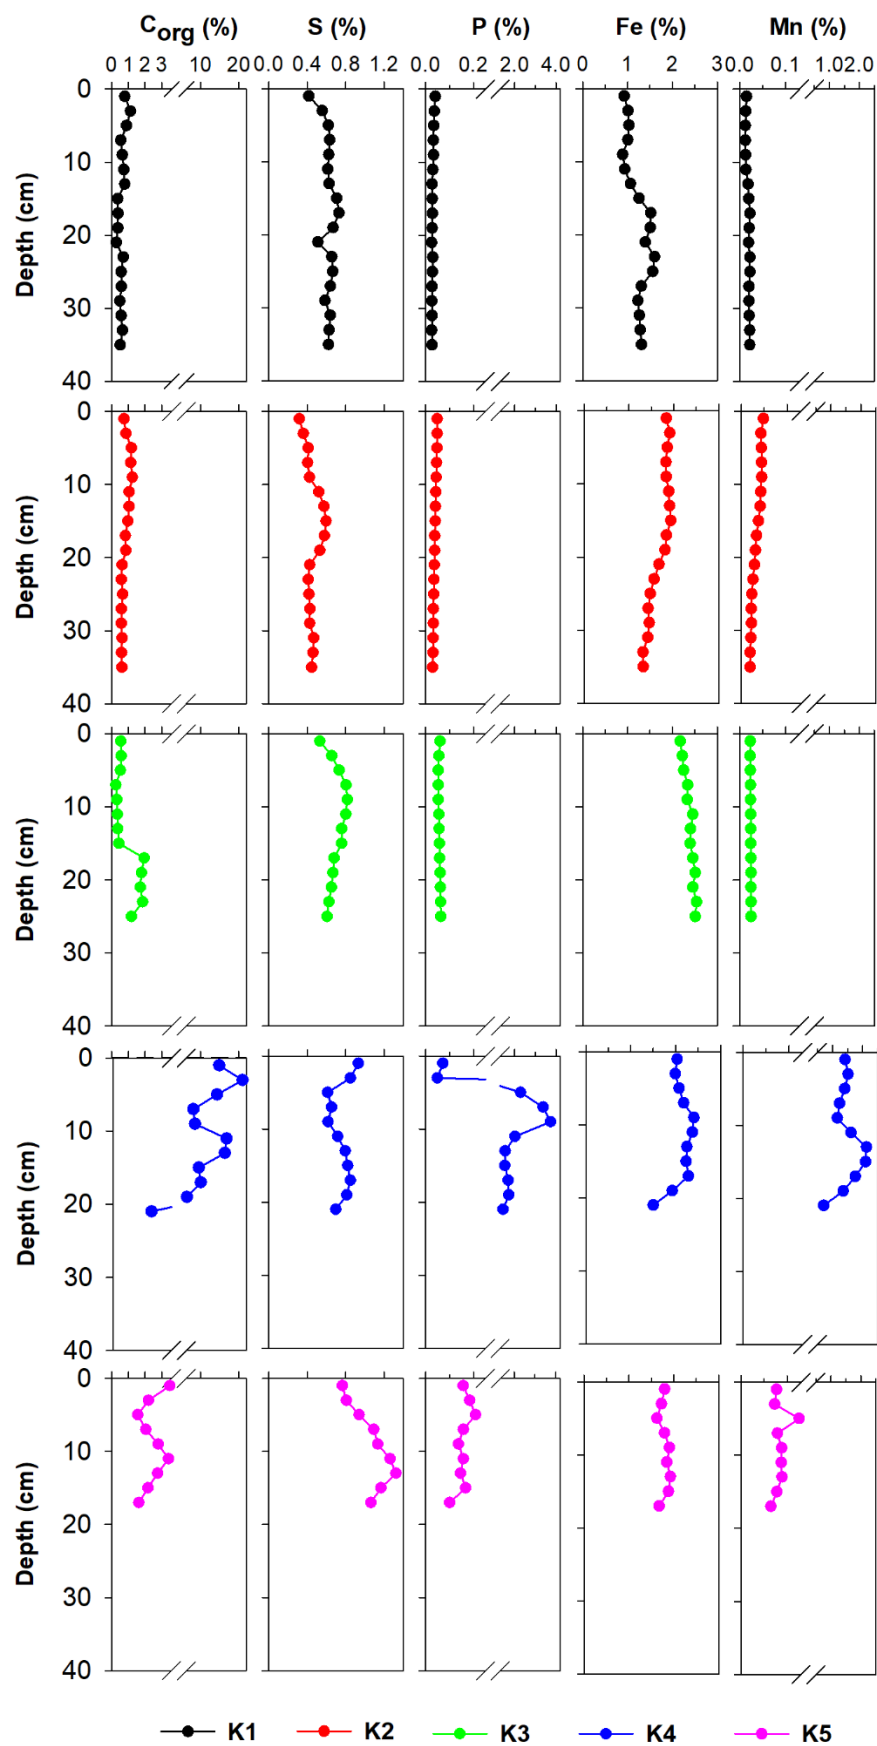

**Figure S2.** The vertical distribution of  $C_{org}$ , S, P, Fe and Mn in the sediment cores K1-K5.

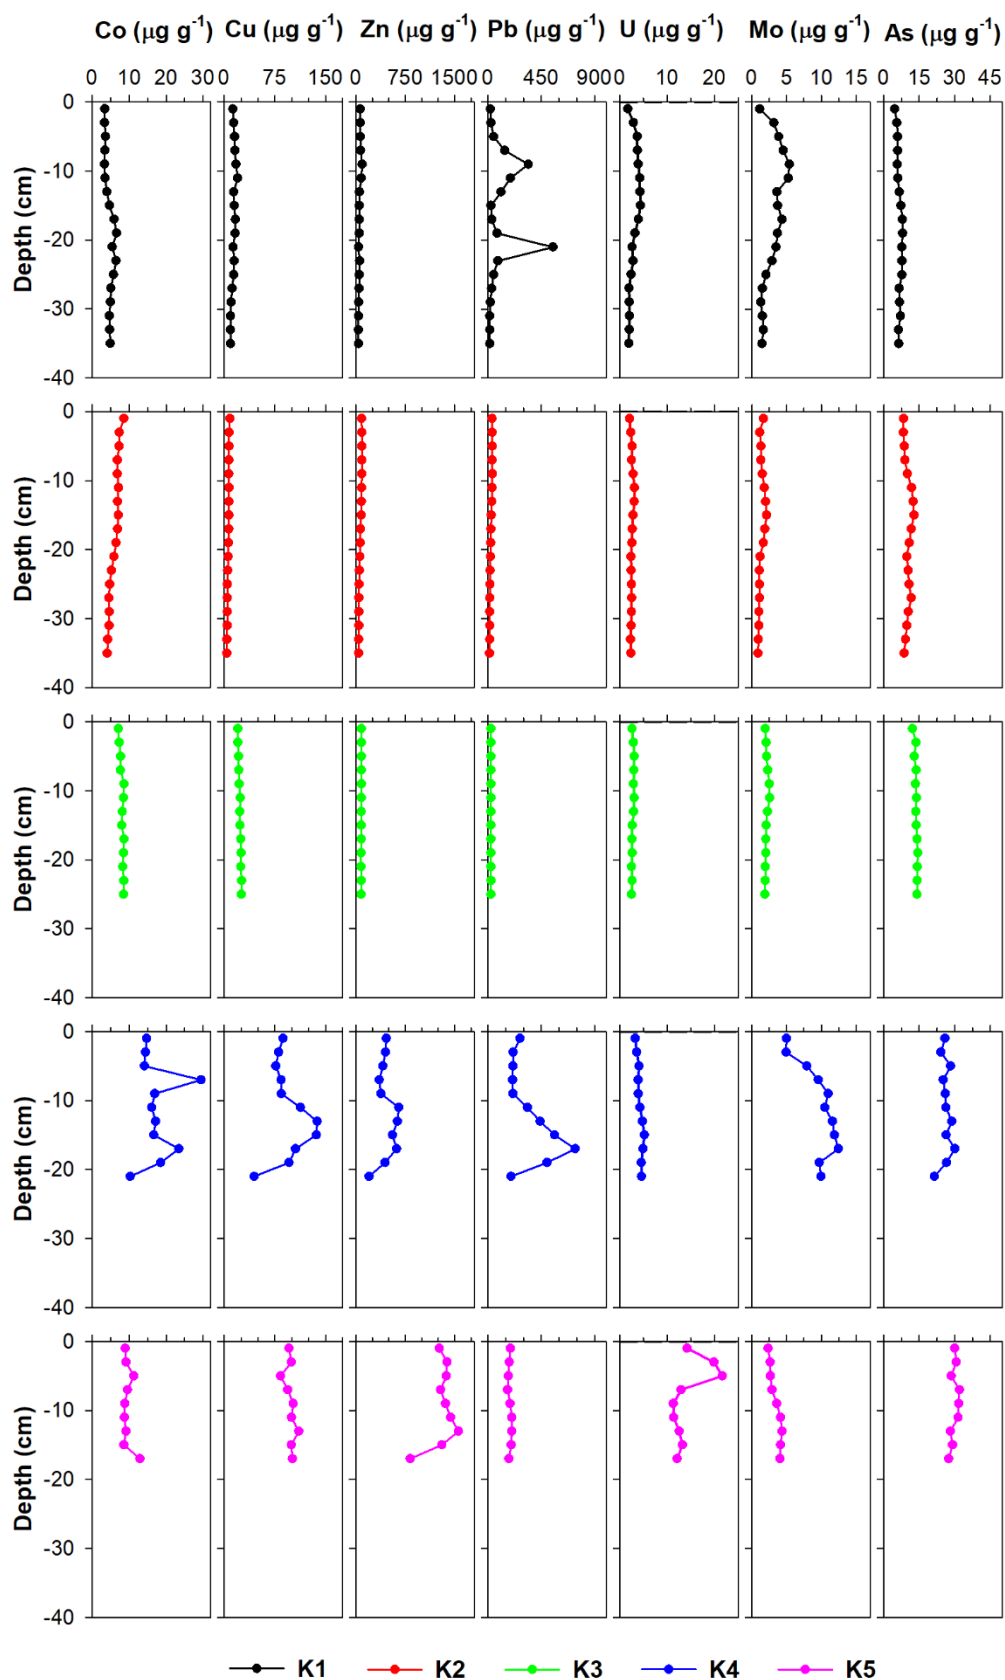

**Figure S3.** The vertical distribution of metals (Co, Cu, Zn, Pb, U, Mo and As) in the sediment cores K1-K5.



**Table S9.** Chemical composition of the K1 sediment core. Sample names indicate the sediment layer depth (cm). Values are expressed in  $\mu\text{g g}^{-1}$ .

|             | K1    |       |       |       |       |       |       |       |       |       |       |       |       |       |       |       |       |       |
|-------------|-------|-------|-------|-------|-------|-------|-------|-------|-------|-------|-------|-------|-------|-------|-------|-------|-------|-------|
|             | 0-2   | 2-4   | 4-6   | 6-8   | 8-10  | 10-12 | 12-14 | 14-16 | 16-18 | 18-20 | 20-22 | 22-24 | 24-26 | 26-28 | 28-30 | 30-32 | 32-34 | 34-36 |
| <b>Li</b>   | 26.5  | 28.1  | 30.6  | 28.5  | 25.5  | 27.7  | 29.2  | 33.1  | 34.7  | 33.4  | 27.4  | 34.9  | 36.0  | 32.6  | 35.1  | 36.4  | 36.6  | 36.5  |
| <b>Mo</b>   | 1.15  | 3.17  | 3.87  | 4.53  | 5.42  | 5.25  | 3.63  | 3.74  | 4.37  | 3.69  | 3.48  | 2.90  | 2.05  | 1.53  | 1.32  | 1.52  | 1.66  | 1.48  |
| <b>Pb</b>   | 19.7  | 25.1  | 48.4  | 141   | 341   | 191   | 111   | 25.8  | 32.3  | 76.6  | 550   | 83.6  | 47.8  | 31.1  | 20.8  | 15.3  | 15.4  | 16.1  |
| <b>U</b>    | 1.68  | 2.84  | 3.68  | 3.71  | 3.92  | 4.22  | 4.26  | 4.39  | 3.96  | 3.18  | 2.58  | 2.76  | 2.35  | 1.92  | 1.97  | 2.02  | 1.95  | 1.88  |
| <b>Mn</b>   | 150   | 136   | 127   | 127   | 130   | 137   | 182   | 201   | 227   | 208   | 197   | 224   | 225   | 206   | 203   | 210   | 221   | 223   |
| <b>Fe</b>   | 9302  | 10114 | 10357 | 10086 | 8958  | 9397  | 10673 | 12605 | 15207 | 15071 | 13987 | 16062 | 15621 | 13084 | 12331 | 12668 | 12859 | 13121 |
| <b>Co</b>   | 3.41  | 3.36  | 3.57  | 3.43  | 3.33  | 3.47  | 3.98  | 4.71  | 5.91  | 6.60  | 5.42  | 6.45  | 5.76  | 5.03  | 4.94  | 4.64  | 4.76  | 4.87  |
| <b>Cu</b>   | 12.8  | 14.1  | 15.5  | 16.0  | 17.3  | 20.0  | 13.9  | 14.7  | 16.5  | 16.2  | 13.3  | 14.8  | 13.9  | 11.8  | 10.3  | 9.48  | 9.13  | 9.37  |
| <b>Zn</b>   | 64.7  | 66.2  | 68.9  | 70.5  | 95.5  | 81.5  | 52.8  | 52.4  | 51.2  | 50.4  | 40.2  | 55.8  | 50.4  | 47.4  | 41.3  | 38.6  | 37.6  | 39.8  |
| <b>As</b>   | 4.64  | 5.54  | 5.90  | 5.86  | 5.74  | 5.92  | 6.62  | 7.27  | 7.86  | 8.00  | 7.66  | 7.76  | 7.69  | 6.49  | 6.70  | 7.11  | 6.20  | 6.39  |
| <b>Corg</b> | 0.779 | 1.13  | 0.881 | 0.548 | 0.633 | 0.725 | 0.786 | 0.364 | 0.381 | 0.376 | 0.270 | 0.687 | 0.570 | 0.573 | 0.481 | 0.565 | 0.642 | 0.507 |
| <b>S</b>    | 0.415 | 0.556 | 0.621 | 0.636 | 0.624 | 0.615 | 0.629 | 0.708 | 0.731 | 0.669 | 0.511 | 0.657 | 0.667 | 0.642 | 0.585 | 0.641 | 0.629 | 0.623 |
| <b>P</b>    | 0.041 | 0.037 | 0.034 | 0.033 | 0.034 | 0.030 | 0.027 | 0.028 | 0.029 | 0.028 | 0.026 | 0.031 | 0.029 | 0.027 | 0.027 | 0.027 | 0.026 | 0.027 |

**Table S10.** Chemical composition of the K2 sediment core. Sample names indicate the sediment layer depth (cm). Values are expressed in  $\mu\text{g g}^{-1}$ .

|             | K2    |       |       |       |       |       |       |       |       |       |       |       |       |       |       |       |       |       |
|-------------|-------|-------|-------|-------|-------|-------|-------|-------|-------|-------|-------|-------|-------|-------|-------|-------|-------|-------|
|             | 0-2   | 2-4   | 4-6   | 6-8   | 8-10  | 10-12 | 12-14 | 14-16 | 16-18 | 18-20 | 20-22 | 22-24 | 24-26 | 26-28 | 28-30 | 30-32 | 32-34 | 34-36 |
| <b>Li</b>   | 60.5  | 61.8  | 59.7  | 58.1  | 60.5  | 53.9  | 60.6  | 60.0  | 58.5  | 58.5  | 54.4  | 51.2  | 49.7  | 48.5  | 47.9  | 46.3  | 43.2  | 42.9  |
| <b>Mo</b>   | 1.70  | 1.15  | 1.34  | 1.31  | 1.52  | 1.81  | 1.98  | 2.14  | 1.88  | 1.66  | 1.20  | 1.09  | 1.11  | 1.12  | 1.04  | 1.03  | 0.953 | 0.887 |
| <b>Pb</b>   | 35.4  | 35.9  | 36.3  | 35.2  | 37.5  | 35.5  | 33.2  | 27.5  | 24.3  | 23.9  | 21.9  | 19.2  | 17.2  | 15.9  | 15.6  | 15.1  | 14.6  | 14.5  |
| <b>U</b>    | 2.03  | 2.30  | 2.55  | 2.46  | 2.76  | 3.05  | 3.02  | 2.76  | 2.60  | 2.51  | 2.34  | 2.38  | 2.45  | 2.49  | 2.43  | 2.36  | 2.24  | 2.33  |
| <b>Mn</b>   | 486   | 431   | 438   | 442   | 446   | 427   | 415   | 378   | 335   | 310   | 289   | 257   | 234   | 222   | 225   | 214   | 196   | 197   |
| <b>Fe</b>   | 18350 | 19085 | 18552 | 18267 | 18280 | 18904 | 19050 | 19295 | 18353 | 18046 | 16690 | 15572 | 14759 | 14272 | 14522 | 14212 | 13156 | 13162 |
| <b>Co</b>   | 8.54  | 7.34  | 7.27  | 6.83  | 6.82  | 7.10  | 6.88  | 7.05  | 6.87  | 6.43  | 5.90  | 5.23  | 4.76  | 4.54  | 4.65  | 4.59  | 4.22  | 4.09  |
| <b>Cu</b>   | 13.4  | 14.3  | 14.4  | 14.1  | 14.2  | 14.5  | 14.5  | 13.7  | 12.9  | 11.8  | 9.97  | 8.53  | 7.64  | 7.02  | 7.28  | 7.22  | 6.63  | 6.51  |
| <b>Zn</b>   | 85.1  | 89.3  | 88.8  | 88.0  | 88.0  | 86.3  | 83.4  | 79.3  | 69.4  | 66.4  | 61.0  | 53.7  | 48.4  | 46.4  | 46.1  | 45.5  | 42.1  | 42.0  |
| <b>As</b>   | 8.35  | 8.28  | 8.67  | 8.91  | 9.96  | 11.8  | 12.4  | 12.8  | 11.6  | 10.8  | 9.76  | 10.3  | 10.7  | 11.6  | 10.4  | 9.72  | 9.20  | 8.63  |
| <b>Corg</b> | 0.740 | 0.854 | 1.18  | 1.13  | 1.24  | 1.04  | 1.05  | 0.971 | 0.822 | 0.847 | 0.620 | 0.578 | 0.660 | 0.576 | 0.579 | 0.620 | 0.590 | 0.608 |
| <b>S</b>    | 0.317 | 0.358 | 0.411 | 0.404 | 0.424 | 0.520 | 0.573 | 0.598 | 0.577 | 0.529 | 0.426 | 0.410 | 0.417 | 0.427 | 0.425 | 0.467 | 0.459 | 0.444 |
| <b>P</b>    | 0.049 | 0.049 | 0.048 | 0.046 | 0.045 | 0.044 | 0.042 | 0.041 | 0.039 | 0.039 | 0.037 | 0.036 | 0.035 | 0.033 | 0.033 | 0.032 | 0.032 | 0.030 |

**Table S11.** Chemical composition of the K3 sediment core. Sample names indicate the sediment layer depth (cm). Values are expressed in  $\mu\text{g g}^{-1}$ .

|             | K3    |       |       |       |       |       |       |       |       |       |       |       |       |
|-------------|-------|-------|-------|-------|-------|-------|-------|-------|-------|-------|-------|-------|-------|
|             | 0-2   | 2-4   | 4-6   | 6-8   | 8-10  | 10-12 | 12-14 | 14-16 | 16-18 | 18-20 | 20-22 | 22-24 | 24-26 |
| <b>Li</b>   | 47.9  | 47.5  | 47.8  | 50.1  | 49.4  | 51.8  | 50.5  | 49.8  | 50.6  | 51.2  | 50.0  | 51.7  | 50.7  |
| <b>Mo</b>   | 1.93  | 2.06  | 2.12  | 2.31  | 2.52  | 2.56  | 2.26  | 2.09  | 2.01  | 2.03  | 1.94  | 1.94  | 1.87  |
| <b>Pb</b>   | 24.3  | 24.4  | 24.7  | 25.4  | 25.1  | 25.8  | 25.5  | 25.5  | 25.2  | 25.5  | 24.8  | 26.1  | 25.8  |
| <b>U</b>    | 2.52  | 2.86  | 2.99  | 2.94  | 2.85  | 3.02  | 2.90  | 2.63  | 2.54  | 2.59  | 2.47  | 2.56  | 2.44  |
| <b>Mn</b>   | 232   | 230   | 235   | 237   | 237   | 240   | 240   | 241   | 247   | 249   | 246   | 251   | 249   |
| <b>Fe</b>   | 21760 | 22256 | 22528 | 23417 | 23316 | 24571 | 24039 | 23967 | 24572 | 25099 | 24554 | 25421 | 25093 |
| <b>Co</b>   | 7.06  | 7.31  | 7.71  | 7.65  | 8.62  | 8.45  | 8.14  | 8.01  | 8.60  | 8.48  | 8.28  | 8.55  | 8.46  |
| <b>Cu</b>   | 20.2  | 20.3  | 21.5  | 21.8  | 22.1  | 24.0  | 23.1  | 23.3  | 24.4  | 25.0  | 24.6  | 25.9  | 25.4  |
| <b>Zn</b>   | 82.7  | 82.1  | 81.6  | 82.8  | 81.6  | 83.6  | 80.2  | 80.7  | 78.9  | 78.2  | 77.1  | 79.8  | 77.9  |
| <b>As</b>   | 12.1  | 13.6  | 12.9  | 13.7  | 13.4  | 13.9  | 13.6  | 13.7  | 14.1  | 14.4  | 14.2  | 14.2  | 14.1  |
| <b>Corg</b> | 0.544 | 0.562 | 0.522 | 0.244 | 0.304 | 0.332 | 0.356 | 0.427 | 1.95  | 1.79  | 1.72  | 1.86  | 1.19  |
| <b>S</b>    | 0.531 | 0.656 | 0.734 | 0.805 | 0.818 | 0.804 | 0.759 | 0.760 | 0.681 | 0.668 | 0.653 | 0.627 | 0.608 |
| <b>P</b>    | 0.060 | 0.056 | 0.053 | 0.054 | 0.053 | 0.056 | 0.057 | 0.059 | 0.059 | 0.061 | 0.062 | 0.063 | 0.064 |

**Table S12.** Chemical composition of the K4 sediment core. Sample names indicate the sediment layer depth (cm). Values are expressed in  $\mu\text{g g}^{-1}$ .

|             | K4    |       |       |       |       |       |       |       |       |       |       |
|-------------|-------|-------|-------|-------|-------|-------|-------|-------|-------|-------|-------|
|             | 0-2   | 2-4   | 4-6   | 6-8   | 8-10  | 10-12 | 12-14 | 14-16 | 16-18 | 18-20 | 20-22 |
| <b>Li</b>   | 35.9  | 31.0  | 31.5  | 42.2  | 51.2  | 41.0  | 33.0  | 39.6  | 36.2  | 27.4  | 15.3  |
| <b>Mo</b>   | 4.99  | 4.94  | 7.92  | 9.56  | 11.0  | 10.5  | 11.6  | 11.9  | 12.5  | 9.71  | 9.95  |
| <b>Pb</b>   | 271   | 212   | 211   | 209   | 211   | 334   | 441   | 562   | 737   | 499   | 195   |
| <b>U</b>    | 3.23  | 3.55  | 4.05  | 3.91  | 3.87  | 4.26  | 4.78  | 5.19  | 4.90  | 4.57  | 4.60  |
| <b>Mn</b>   | 14225 | 15225 | 14089 | 12365 | 11641 | 16165 | 21389 | 21066 | 17650 | 13607 | 7058  |
| <b>Fe</b>   | 20387 | 19946 | 20790 | 21806 | 24081 | 23743 | 22532 | 22378 | 22872 | 19268 | 15029 |
| <b>Co</b>   | 14.7  | 14.4  | 14.1  | 29.5  | 16.9  | 16.1  | 17.1  | 16.6  | 23.4  | 18.5  | 10.3  |
| <b>Ni</b>   | 71.6  | 63.4  | 68.8  | 71.5  | 88.3  | 90.3  | 97.9  | 80.3  | 71.0  | 66.1  | 46.0  |
| <b>Cu</b>   | 86.9  | 80.7  | 76.4  | 84.1  | 84.5  | 113   | 138   | 136   | 106   | 95.9  | 44.2  |
| <b>Zn</b>   | 461   | 450   | 410   | 353   | 380   | 650   | 631   | 554   | 618   | 441   | 201   |
| <b>As</b>   | 25.8  | 24.2  | 28.2  | 25.1  | 26.0  | 26.3  | 28.8  | 26.3  | 30.0  | 26.5  | 21.4  |
| <b>Corg</b> | 14.8  | 21.0  | 14.3  | 8.11  | 8.54  | 16.8  | 16.3  | 9.58  | 10.0  | 6.42  | 2.39  |
| <b>S</b>    | 0.933 | 0.850 | 0.613 | 0.654 | 0.618 | 0.719 | 0.798 | 0.822 | 0.850 | 0.814 | 0.697 |
| <b>P</b>    | 0.073 | 0.049 | 2.29  | 3.38  | 3.73  | 2.02  | 1.54  | 1.53  | 1.69  | 1.72  | 1.44  |

**Table S13.** Chemical composition of the K5 sediment core. Sample names indicate the sediment layer depth (cm). Values are expressed in  $\mu\text{g g}^{-1}$ .

|             | K5    |       |       |       |        |       |        |       |       |
|-------------|-------|-------|-------|-------|--------|-------|--------|-------|-------|
|             | 0-2   | 2-4   | 4-6   | 6-8   | 8-10   | 10-12 | 12-14  | 14-16 | 16-18 |
| <b>Li</b>   | 23.9  | 22.3  | 21.9  | 28.4  | 32.2   | 32.2  | 31.6   | 30.7  | 27.3  |
| <b>Mo</b>   | 2.35  | 2.65  | 2.67  | 2.90  | 3.59   | 4.13  | 4.35   | 4.13  | 4.05  |
| <b>Pb</b>   | 190   | 181   | 173   | 166   | 187    | 201   | 202    | 196   | 177   |
| <b>U</b>    | 14.2  | 19.9  | 21.7  | 13.0  | 11.3   | 11.4  | 12.6   | 13.3  | 12.1  |
| <b>Mn</b>   | 771   | 727   | 1261  | 788   | 879    | 872   | 889    | 777   | 646   |
| <b>Fe</b>   | 17982 | 17234 | 16239 | 17909 | 19026  | 18427 | 19227  | 18794 | 16740 |
| <b>Co</b>   | 8.92  | 9.14  | 11.2  | 9.58  | 8.83   | 8.74  | 9.15   | 8.58  | 12.9  |
| <b>Cu</b>   | 95.8  | 99.3  | 83.3  | 94.0  | 102.15 | 99.7  | 110.25 | 99.1  | 101   |
| <b>Zn</b>   | 1269  | 1384  | 1375  | 1286  | 1363   | 1439  | 1561   | 1307  | 827   |
| <b>As</b>   | 30.0  | 30.6  | 28.5  | 32.0  | 31.7   | 31.4  | 28.2   | 29.1  | 27.5  |
| <b>Corg</b> | 3.49  | 2.21  | 1.56  | 2.05  | 2.80   | 3.41  | 2.77   | 2.18  | 1.63  |
| <b>S</b>    | 0.768 | 0.809 | 0.941 | 1.09  | 1.14   | 1.26  | 1.32   | 1.17  | 1.06  |
| <b>P</b>    | 0.158 | 0.185 | 0.209 | 0.159 | 0.138  | 0.159 | 0.146  | 0.168 | 0.101 |

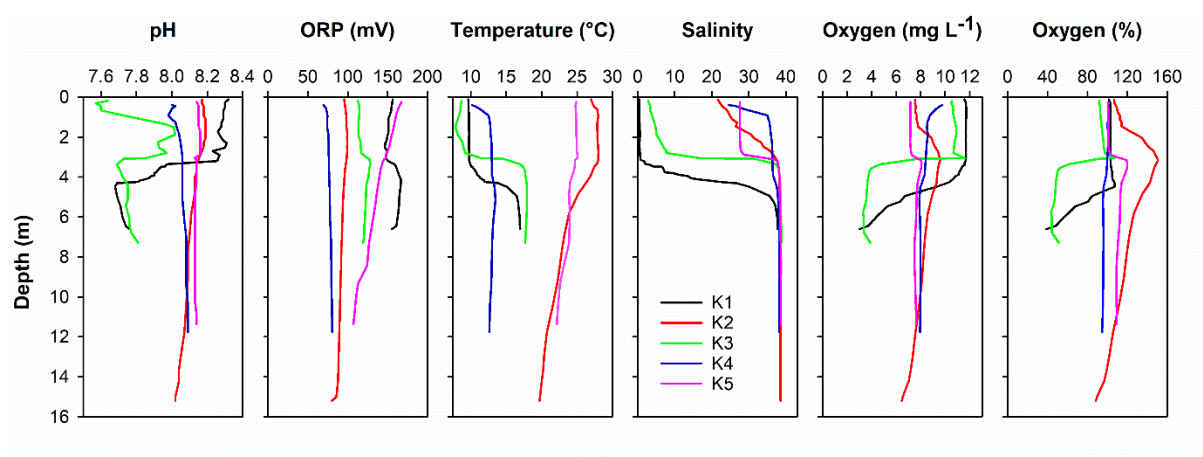

**Figure S4.** The physicochemical parameters measured in the water column at sampling locations K1-K5 in the Krka River estuary
